# Supplementary material
Source: Springer Nature journal article supplement (https://www.springermedizin.de/resource/supplementary/13014_2010_397_MOESM12_ESM.pdf/9633704)

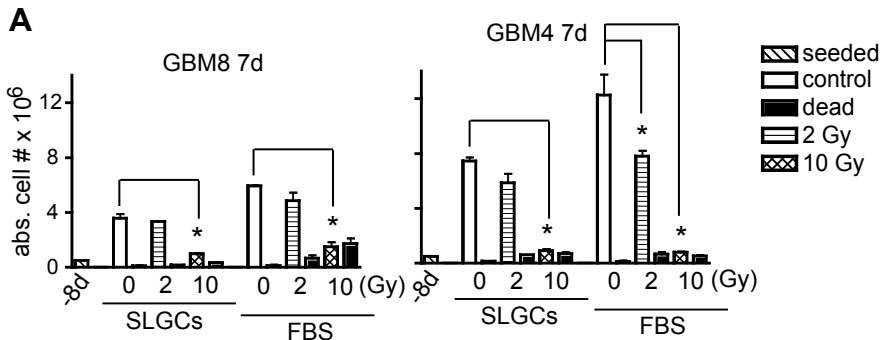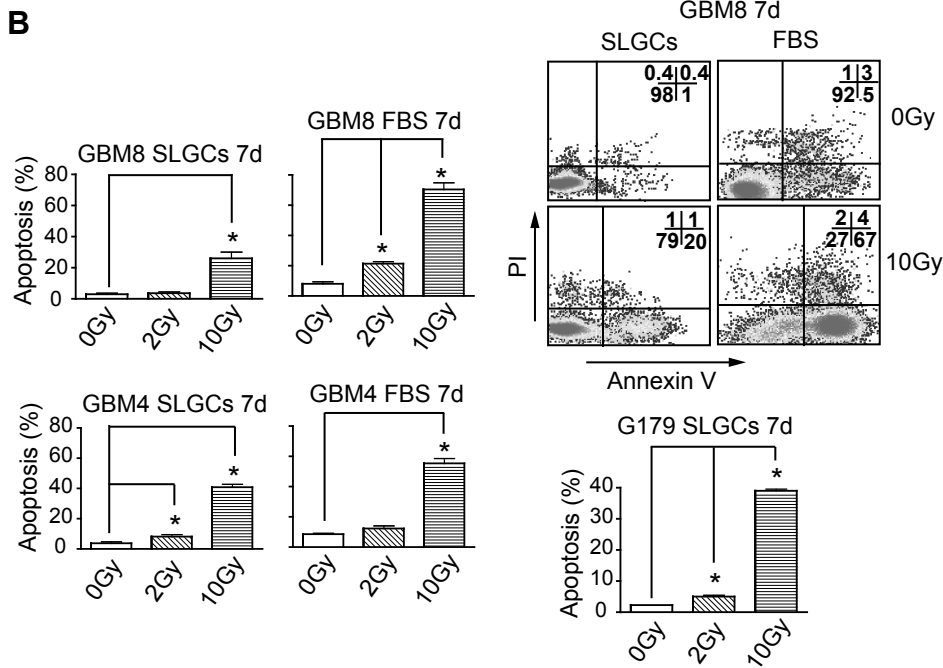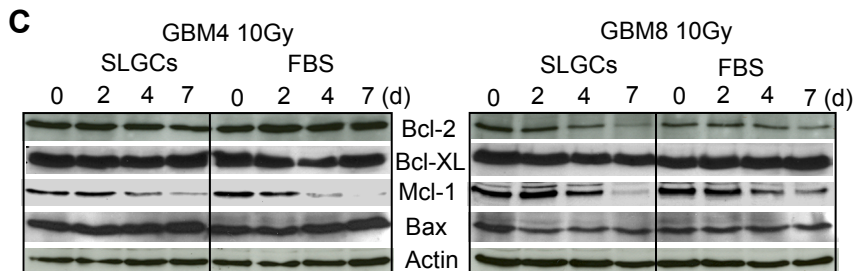

Supplement: MOESM12 [file 9633704]
